# Supplementary material
Source: publisher figshare collection journal article supplement (https://acs.figshare.com/ndownloader/files/4076788)
Supplement: Supplementary file 1 [file 4076788]

# One-pot racemization process of 1-phenyl-1,2,3,4-tetrahydroisoquinoline - a key intermediate for the antimuscarinic agent solifenacin

Cristiano Bolchi, Marco Pallavicini, Laura Fumagalli, Valentina Straniero, Ermanno Valoti

**Supporting information**

## CONTENTS

|     |                                                                      |         |
|-----|----------------------------------------------------------------------|---------|
| I   | General Remarks                                                      | page 3  |
| II  | Analytical Data                                                      |         |
|     | <b>(S)-N-chloro-1-phenyl-1,2,3,4-tetrahydroisoquinoline [(S)-7].</b> |         |
|     | <sup>1</sup> H NMR and <sup>13</sup> C NMR                           | page 4  |
|     | Mass spectrum and thermal analysis                                   | page 5  |
|     | <b>1-phenyl-3,4-dihydroisoquinoline HCl [2·HCl].</b>                 |         |
|     | <sup>1</sup> H NMR and <sup>13</sup> C NMR                           | page 6  |
|     | Thermal analysis                                                     | page 7  |
|     | <b>1-phenyl-1,2,3,4-tetrahydroisoquinoline [<i>rac</i>-3].</b>       |         |
|     | <sup>1</sup> H NMR and <sup>13</sup> C NMR                           | page 8  |
|     | Chiral HPLC analysis                                                 | page 9  |
|     | DSC trace                                                            | page 10 |
|     | DSC traces of enantiomer/racemate mixtures and binary phase diagram  | page 11 |
|     | IR spectra                                                           | page 12 |
| III | Resolutions of racemized <b>3</b>                                    | page 13 |

## I. General Remarks

$^1\text{H}$  NMR spectra were recorded on a Varian Gemini 300 operating at 300 MHz and  $^{13}\text{C}$  NMR at 75 MHz. Chemical shifts are reported in ppm relative to residual solvent ( $\text{CHCl}_3$  or DMSO) as internal standard. ESI-MS analyses were acquired using TSQ Quantum di ThermoFinnigan, Rodano. The melting points were determined by DSC analysis. The DSC curves were recorded and integrated with the aid of a TA Instruments DSC 2010 apparatus. The enantiomer mixtures of **3** were prepared by mixing the solid racemate with the solid (*S*)-enantiomer. The TGA curves were recorded with the aid of a TA instruments TGA Q50 apparatus. Optical rotations were determined in a 1 a 1 dm cell of 1 ml capacity using a Perkin-Elmer 241 polarimeter. Enantiomeric excesses of **3** were determined by HPLC after conversion into acetamide using a Kromasil AmyCoat column (250x4.6 mm i.d.) as chiral stationary phase at 220 nm. All the analytical data refer to crude products excepting those referring to (*S*)-**3** used as starting material and to (*S*)-**3** recovered from the resolutions with tartaric acid.

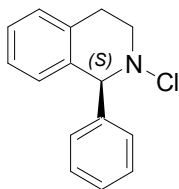

**(S)-N-chloro-1-phenyl-1,2,3,4-tetrahydroisoquinoline [(S)-7].**

$^1\text{H}$  NMR (300 MHz,  $\text{CDCl}_3$ )

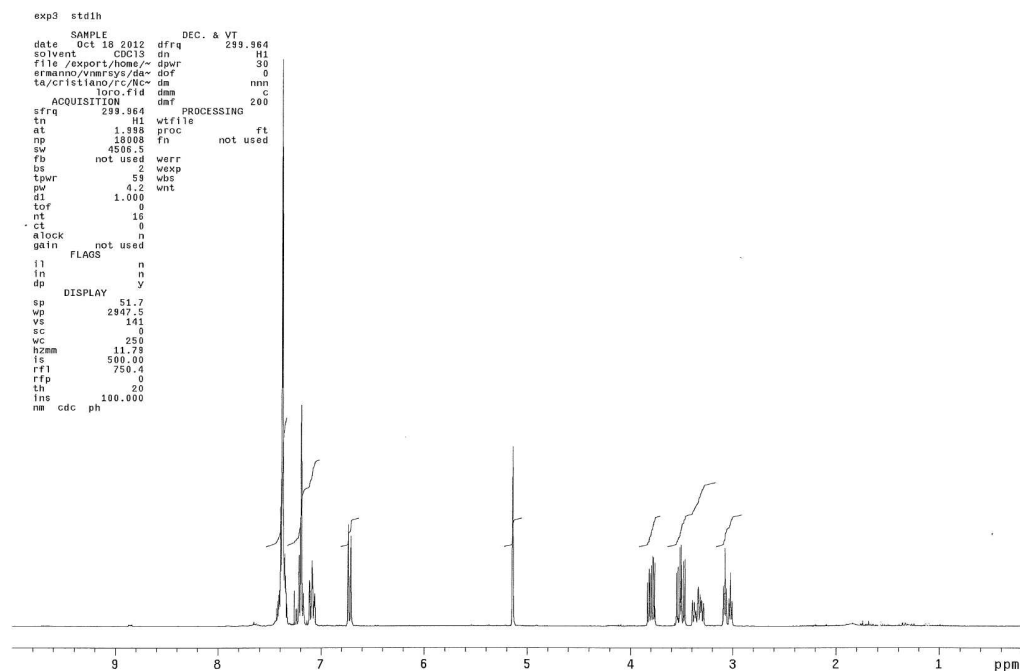

$^{13}\text{C}$  NMR(75 MHz,  $\text{CDCl}_3$ )

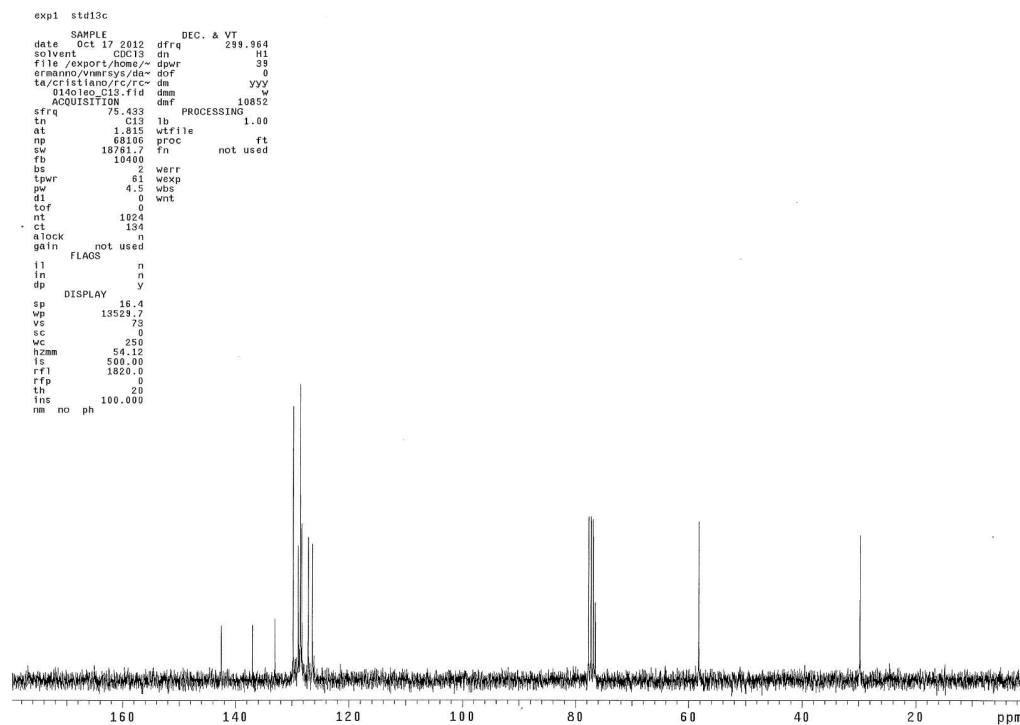

Mass spectrum of (S)-7

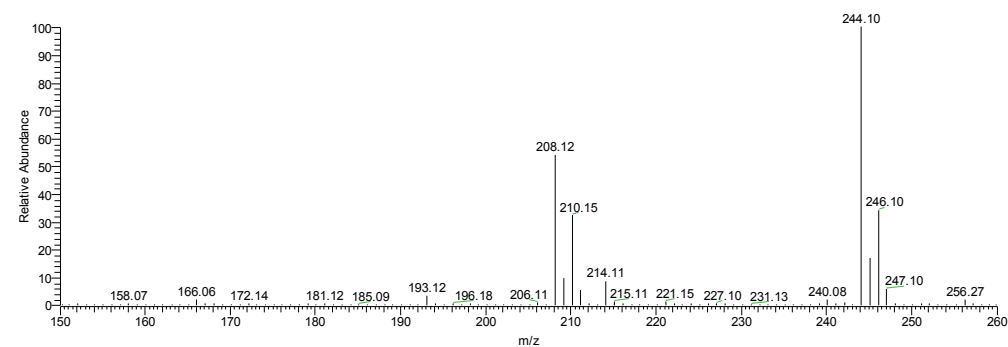

DSC trace of (S)-7

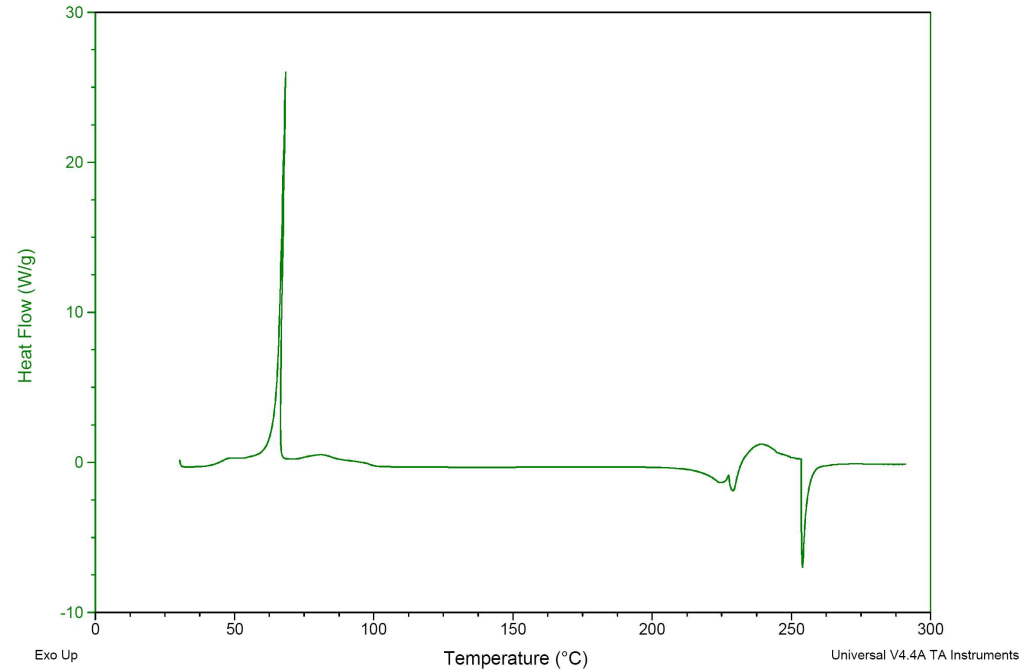

TGA curve of (S)-7

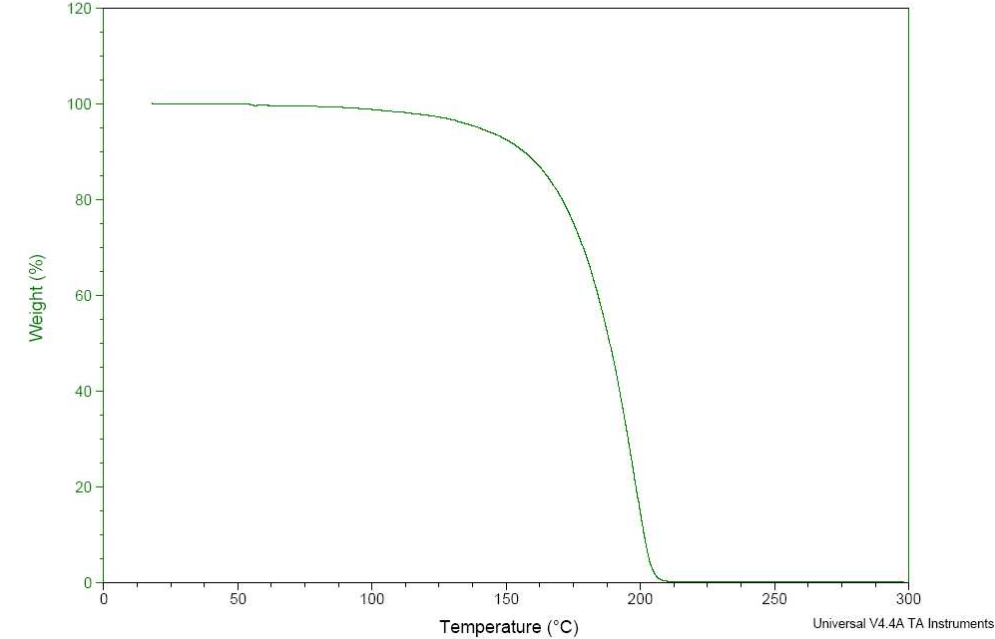

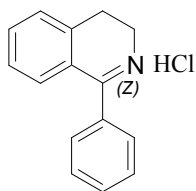

# 1-phenyl-3,4-dihydroisoquinoline HCl [2·HCl].

## <sup>1</sup>H NMR (300 MHz, DMSO-*d*<sub>6</sub>)

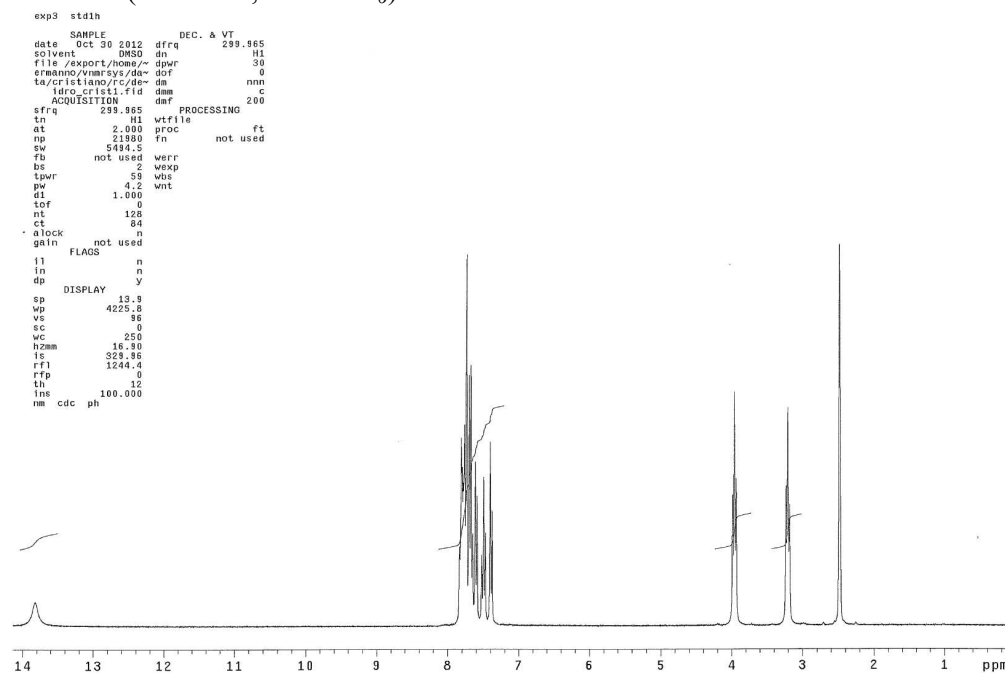

## <sup>13</sup>C NMR(75 MHz, DMSO-*d*<sub>6</sub>)

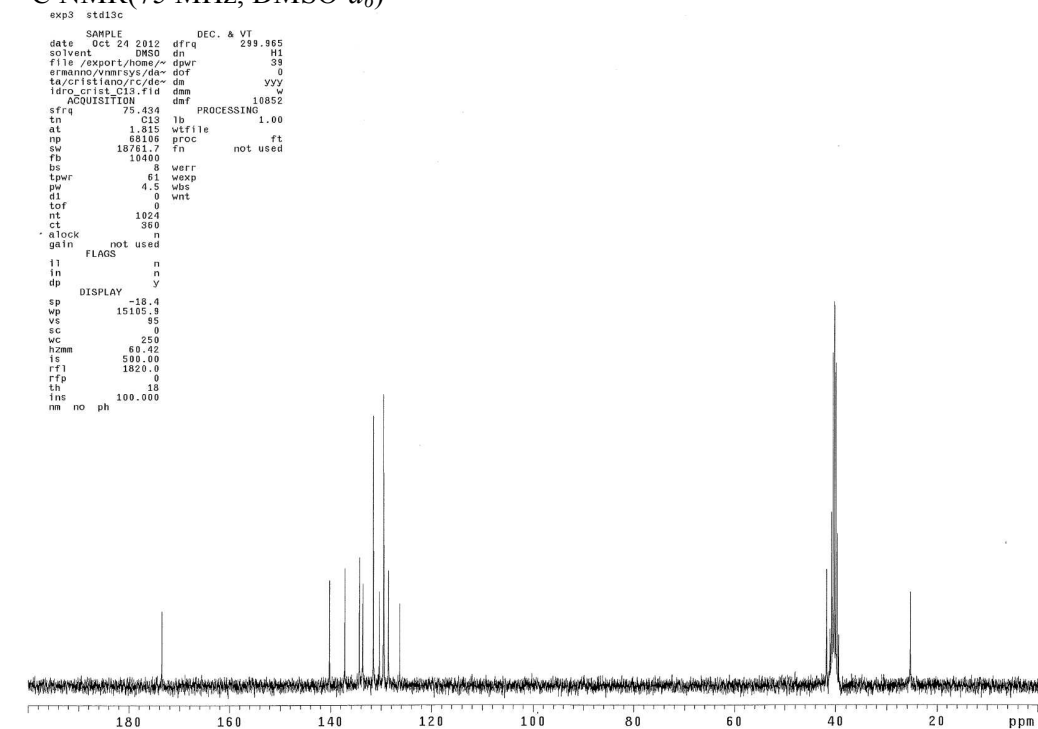

DSC trace of **2**·HCl

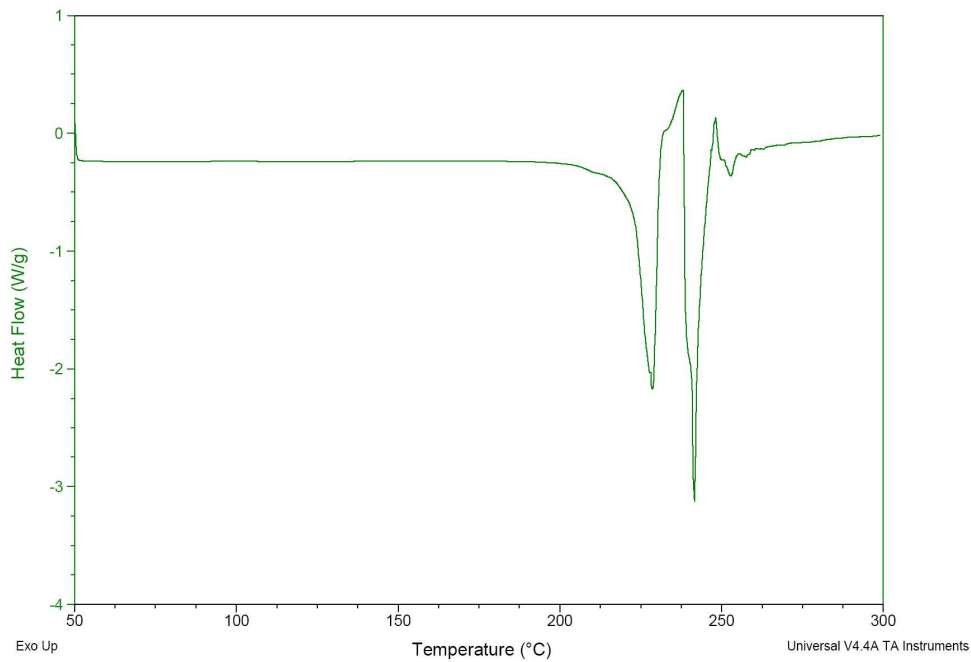

TGA trace of **2**·HCl

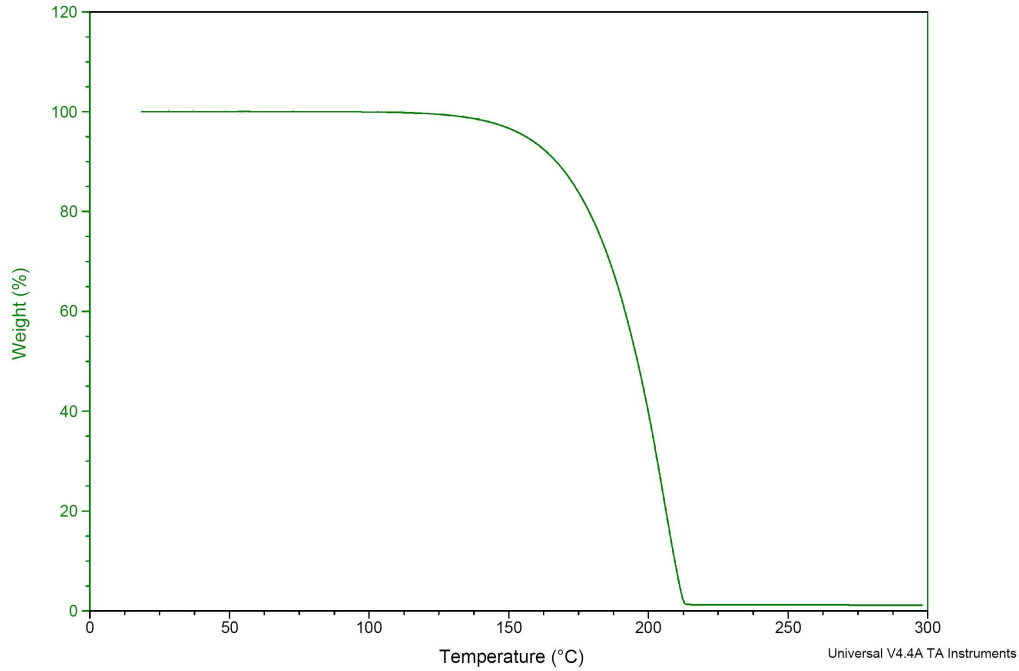

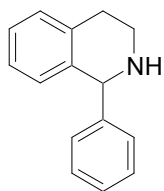

# 1-phenyl-1,2,3,4-tetrahydroisoquinoline [*rac*-3].

## <sup>1</sup>H NMR (300 MHz, CDCl<sub>3</sub>)

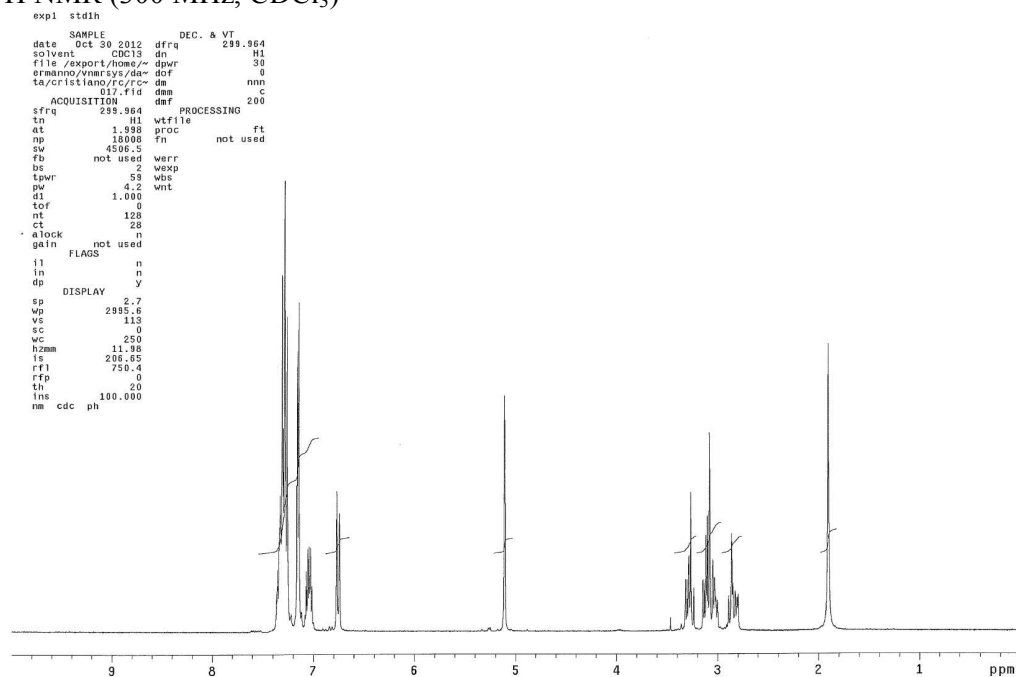

## <sup>13</sup>C (75 MHz, CDCl<sub>3</sub>)

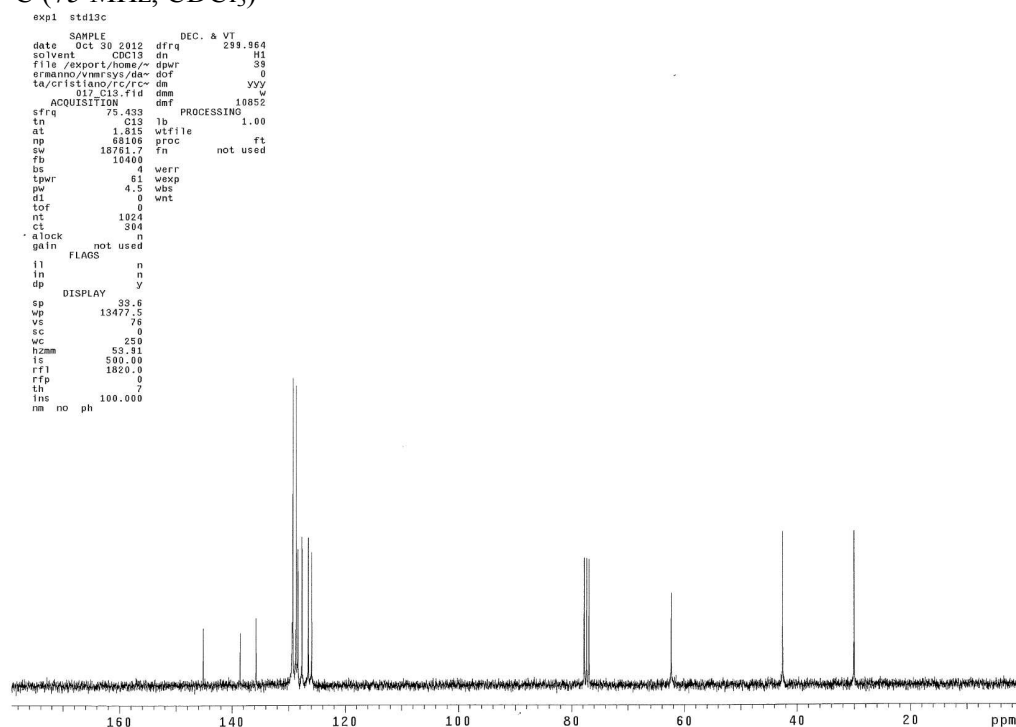



### Enantiomeric composition of starting material (*S*)-3

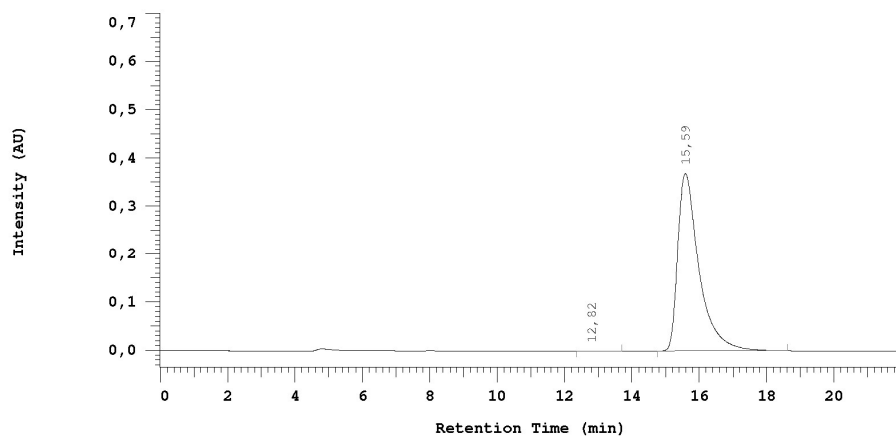

Acquisition Method: fase diretta chirale  
 Column Type:  
 Method Description: esano:IsPrOH 9:1 220 nm F=0,8  
 Peak Quantitation: AREA  
 Calculation Method: AREA%

| No. | RT    | Area    | Conc 1  | BC |
|-----|-------|---------|---------|----|
| 1   | 12,82 | 3723    | 0,046   | MC |
| 2   | 15,59 | 8058116 | 99,954  | MC |
|     |       | 8061839 | 100,000 |    |

### Enantiomeric composition of *rac*-3 obtained by one-pot racemization of (*S*)-3

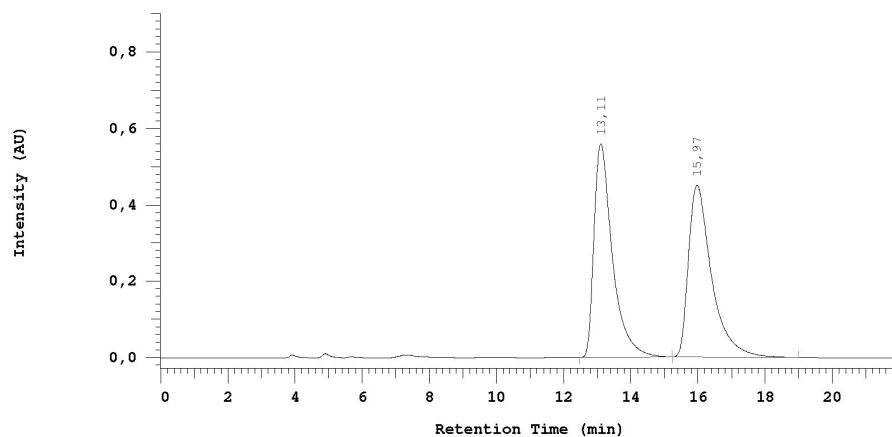

Acquisition Method: fase diretta chirale  
 Column Type:  
 Method Description: esano:IsPrOH 9:1 220 nm F=0,8  
 Peak Quantitation: AREA  
 Calculation Method: AREA%

| No. | RT    | Area     | Conc 1  | BC |
|-----|-------|----------|---------|----|
| 1   | 13,11 | 10654908 | 49,836  | MC |
| 2   | 15,97 | 10724958 | 50,164  | MC |
|     |       | 21379866 | 100,000 |    |

DSC trace of one pot *rac*-**3** obtained by one-pot racemization of (*S*)-**3**

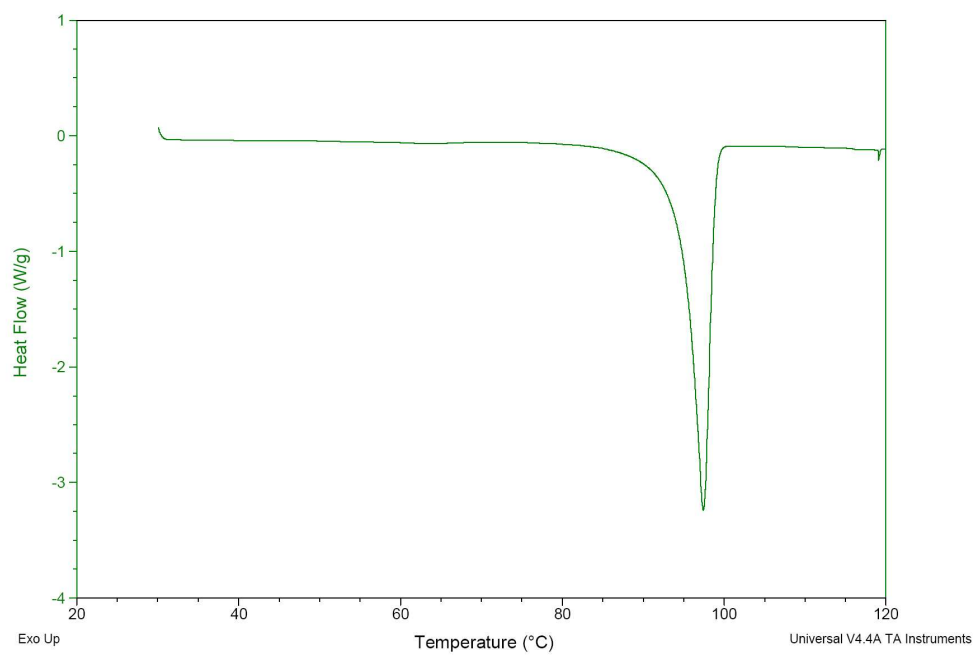

DSC traces of (S)-**3**/*rac*-**3** mixtures utilized to construct the binary melting point phase diagram of **3**.

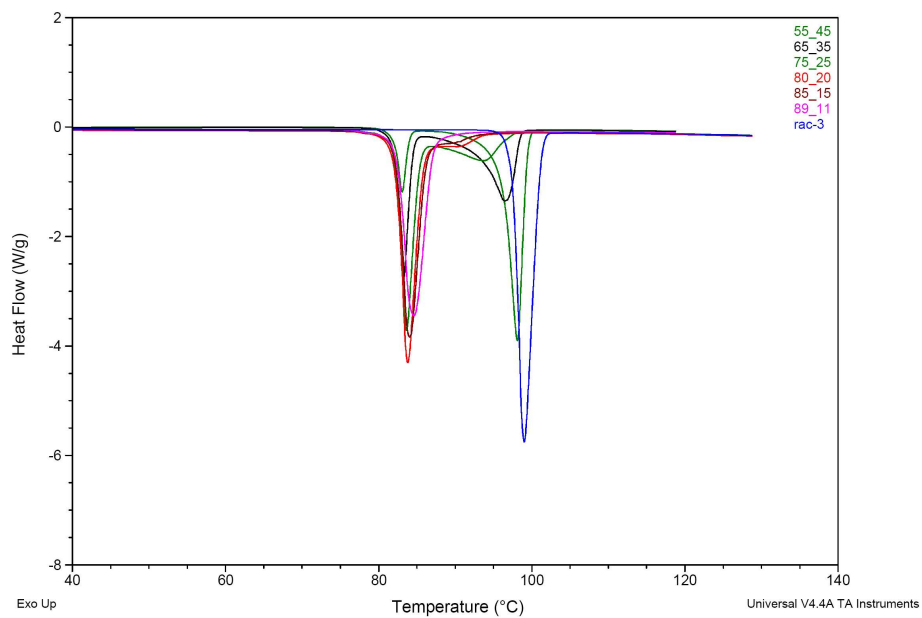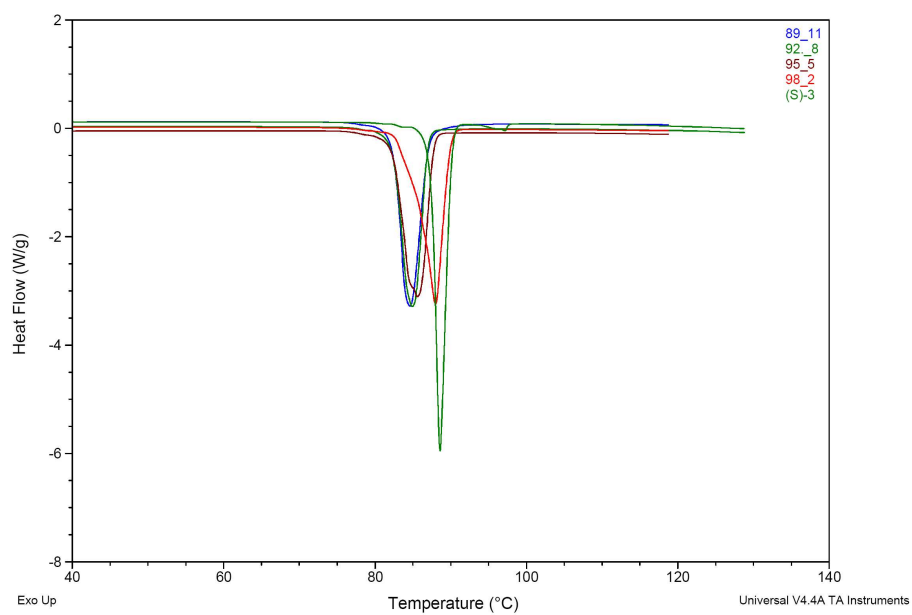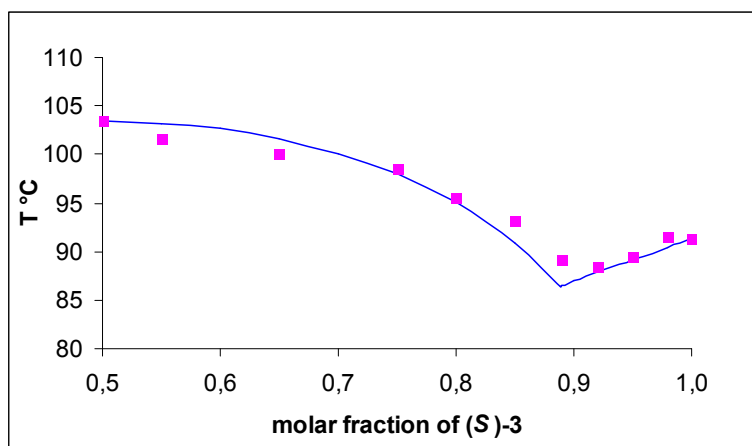

# Overlapped IR spectra of *rac*-**3** and (*S*)-**3**

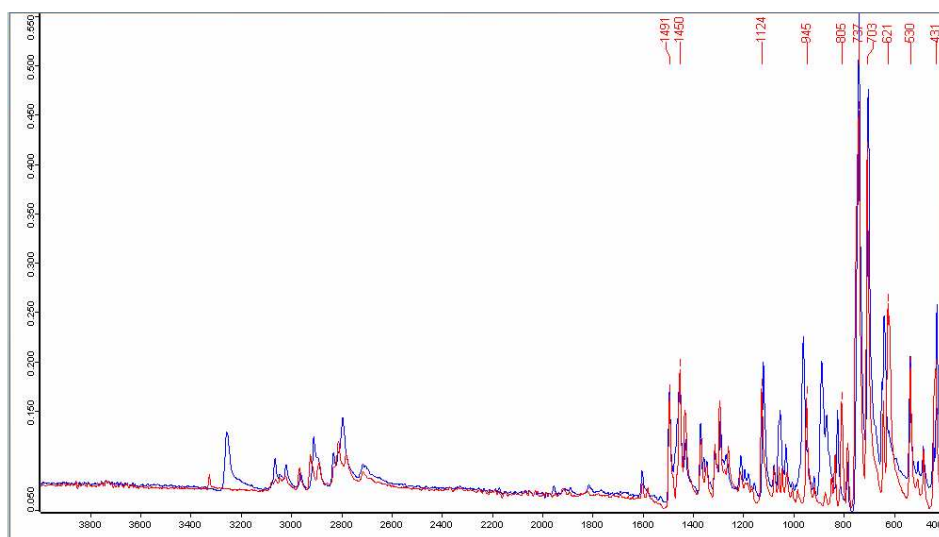

Enantiomeric composio of (*S*)-**3** obtained by resolution of *rac*-**3** resulting from the one-pot racemization of (*S*)-**3**

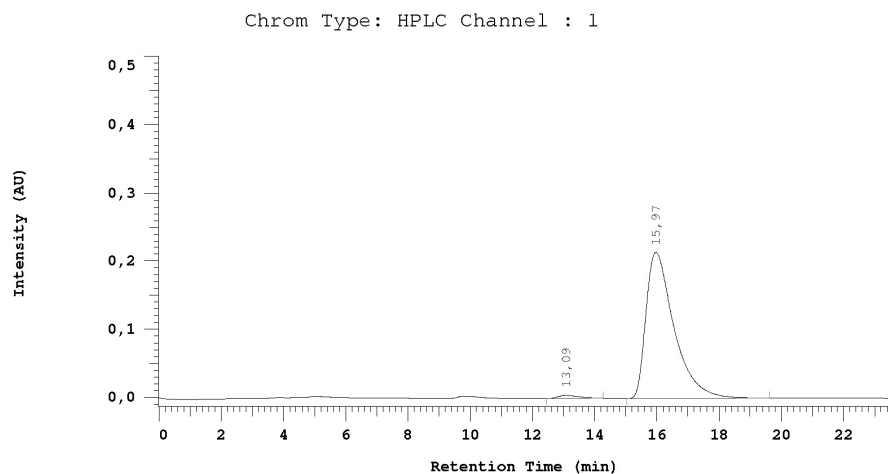

Acquisition Method: fase diretta chirale  
 Column Type:  
 Method Description: esano:IsPrOH 9:1 220 nm F=0,8  
 Peak Quantitation: AREA  
 Calculation Method: AREA%

| No. | RT    | Area    | Conc 1  | BC |
|-----|-------|---------|---------|----|
| 1   | 13,09 | 111118  | 1,631   | MC |
| 2   | 15,97 | 6701696 | 98,369  | MC |
|     |       | 6812814 | 100,000 |    |

Enantiomerically enriched (*R*)-**3** from the mother liquors of the above resolution

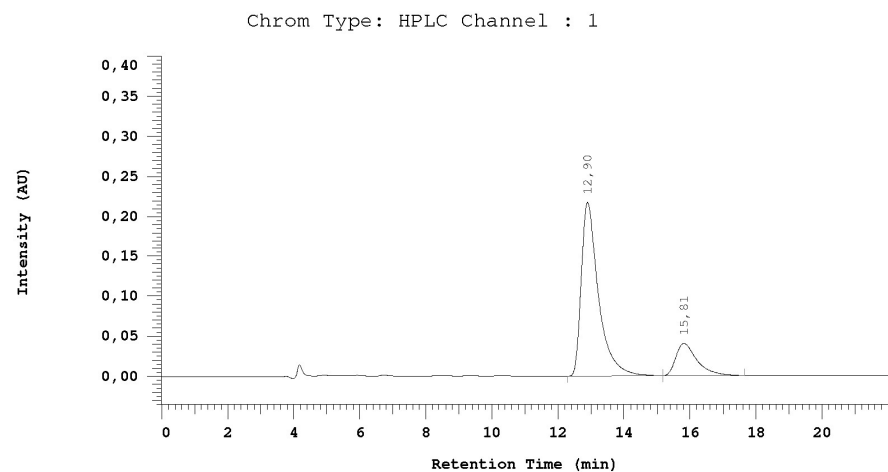

Acquisition Method: fase diretta chirale  
 Column Type:  
 Method Description: esano:IsPrOH 9:1 220 nm F=0,8  
 Peak Quantitation: AREA  
 Calculation Method: AREA%

| No. | RT    | Area    | Conc 1  | BC |
|-----|-------|---------|---------|----|
| 1   | 12,90 | 3941626 | 81,640  | MC |
| 2   | 15,81 | 886445  | 18,360  | MC |
|     |       | 4828071 | 100,000 |    |

<sup>1</sup>H NMR (300 MHz, CDCl<sub>3</sub>) of *rac*-**3** obtained by one-pot racemization of *R* enriched **3** resulting from the preceding resolution

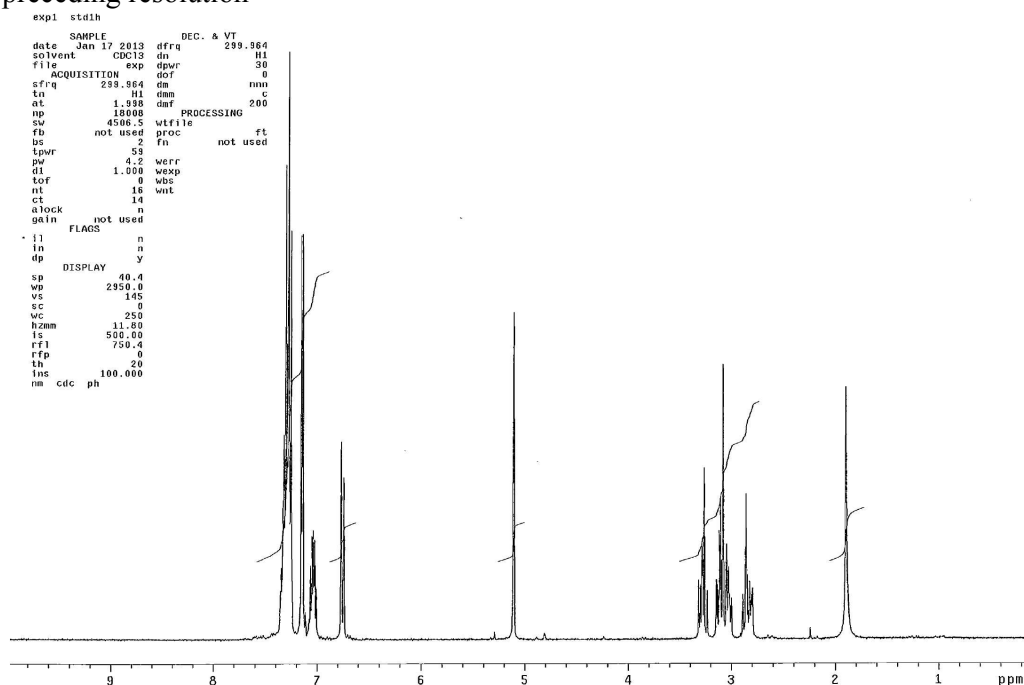

Enantiomeric composition of *rac*-**3** obtained by one-pot racemization of *R* enriched **3** resulting from the preceding resolution

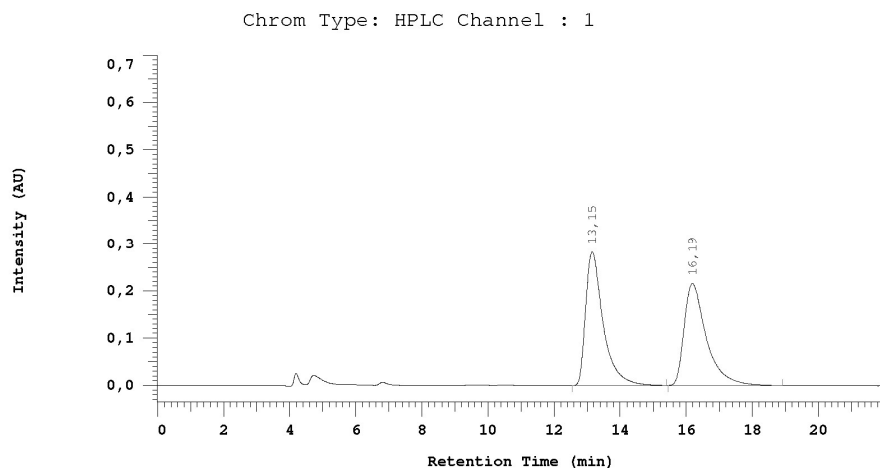

Acquisition Method: fase diretta chirale  
 Column Type:  
 Method Description: esano:IsPrOH 9:1 220 nm F=0,8  
 Peak Quantitation: AREA  
 Calculation Method: AREA%

| No. | RT    | Area     | Conc 1  | BC |
|-----|-------|----------|---------|----|
| 1   | 13,15 | 5221247  | 50,962  | MC |
| 2   | 16,19 | 5024194  | 49,038  | MC |
|     |       | 10245441 | 100,000 |    |

## Enantiomeric composition of (*S*)-3 from the second resolution

Chrom Type: HPLC Channel : 1

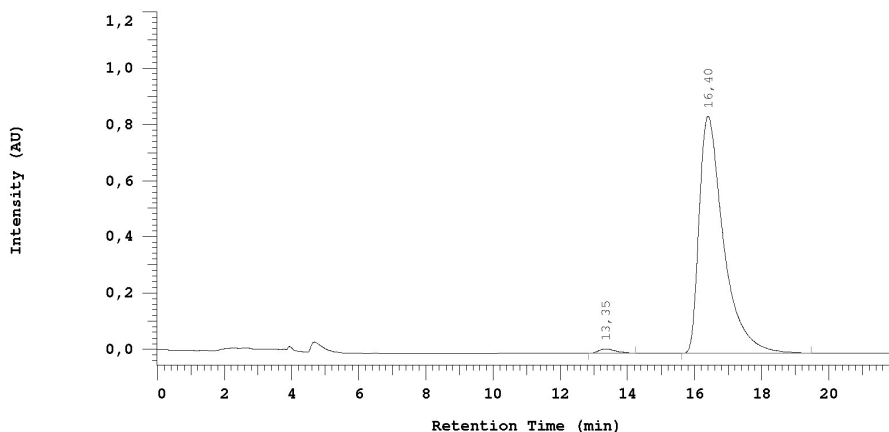

Acquisition Method: fase diretta chirale

Column Type:

Method Description: esano:IsPrOH 9:1 220 nm F=0,8

Peak Quantitation: AREA

Calculation Method: AREA%

| No. | RT    | Area     | Conc 1  | BC |
|-----|-------|----------|---------|----|
| 1   | 13,35 | 274970   | 1,286   | MC |
| 2   | 16,40 | 21112852 | 98,714  | MC |
|     |       | 21387822 | 100,000 |    |

## Enantiomerically enriched (*R*)-3 from the second resolution mother liquors

Chrom Type: HPLC Channel : 1

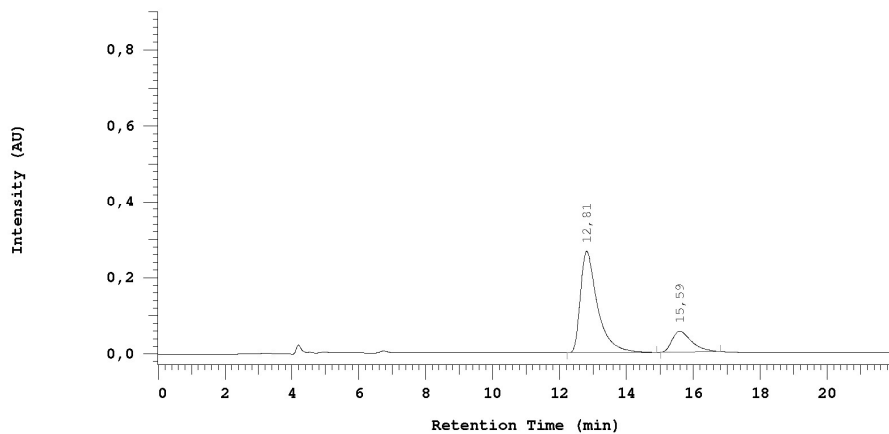

Acquisition Method: fase diretta chirale

Column Type:

Method Description: esano:IsPrOH 9:1 220 nm F=0,8

Peak Quantitation: AREA

Calculation Method: AREA%

| No. | RT    | Area    | Conc 1  | BC |
|-----|-------|---------|---------|----|
| 1   | 12,81 | 4769616 | 81,110  | MC |
| 2   | 15,59 | 1110780 | 18,890  | MC |
|     |       | 5880396 | 100,000 |    |

$^1\text{H}$  NMR (300 MHz,  $\text{CDCl}_3$ ) of (*S*)-**3** obtained bringing together the two previously resolved amounts and recrystallizing them from methanol/water

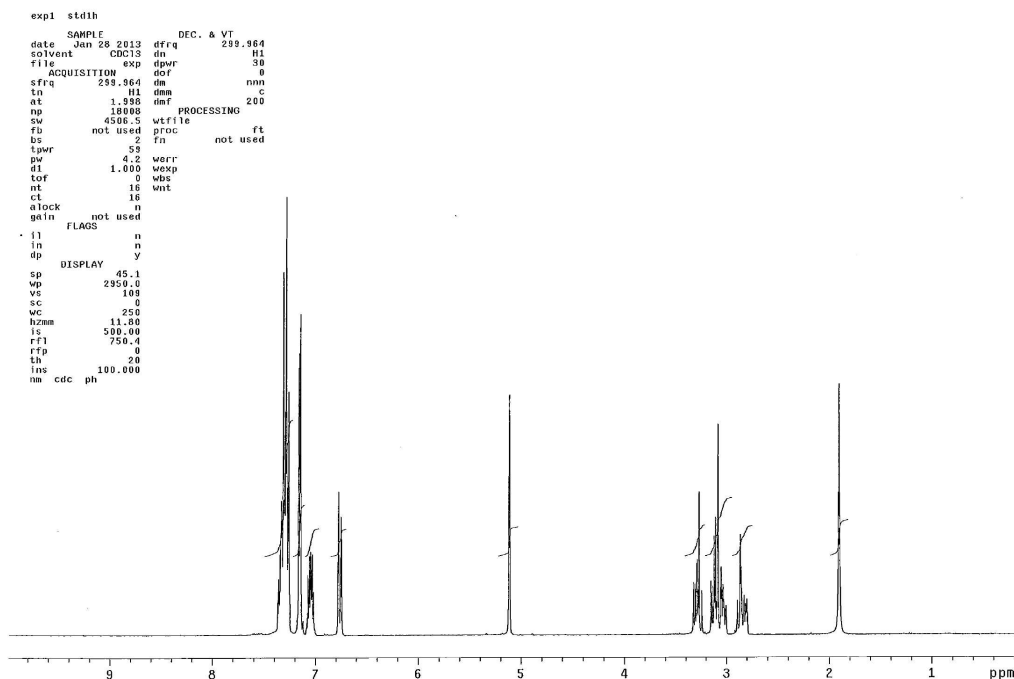

DSC trace of (*S*)-**3** obtained bringing together the two previously resolved amounts and recrystallizing them from methanol/water

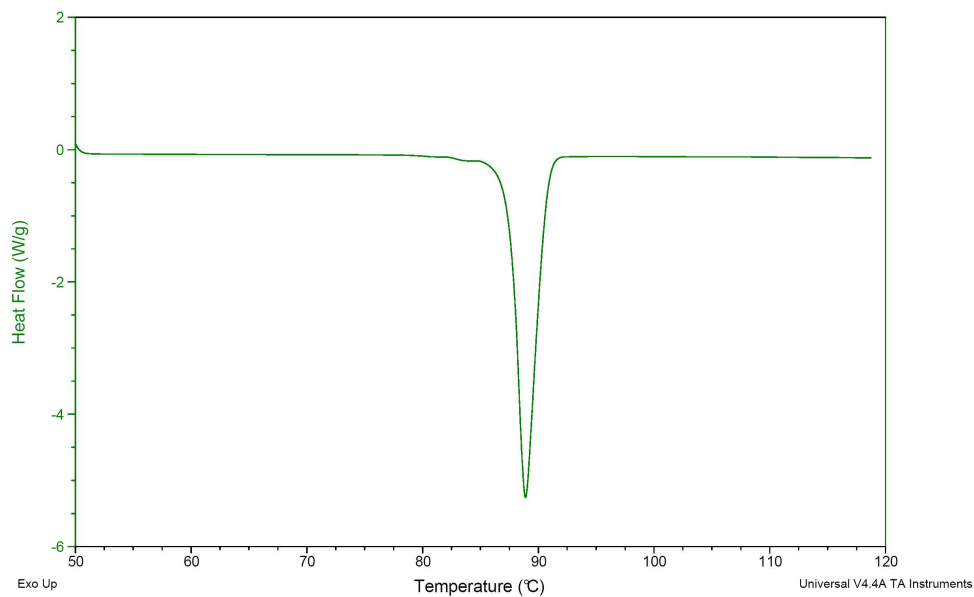



Enantiomeric composition of (*S*)-**3** obtained bringing together the two previously resolved amounts and recrystallizing them from methanol/water

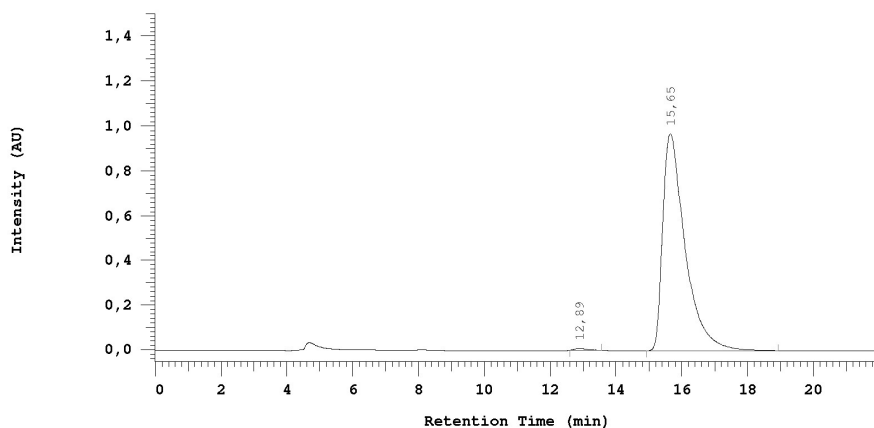

Acquisition Method: fase diretta chirale  
 Column Type:  
 Method Description: esano:IsPrOH 9:1 220 nm F=0,8  
 Peak Quantitation: AREA  
 Calculation Method: AREA%

| No. | RT    | Area     | Conc 1  | BC |
|-----|-------|----------|---------|----|
| 1   | 12,89 | 110472   | 0,480   | MC |
| 2   | 15,65 | 22889700 | 99,520  | MC |
|     |       | 23000172 | 100,000 |    |

Enantiomeric composition of the mother liquors of the recrystallization of (*S*)-**3** ( $E^+$ )

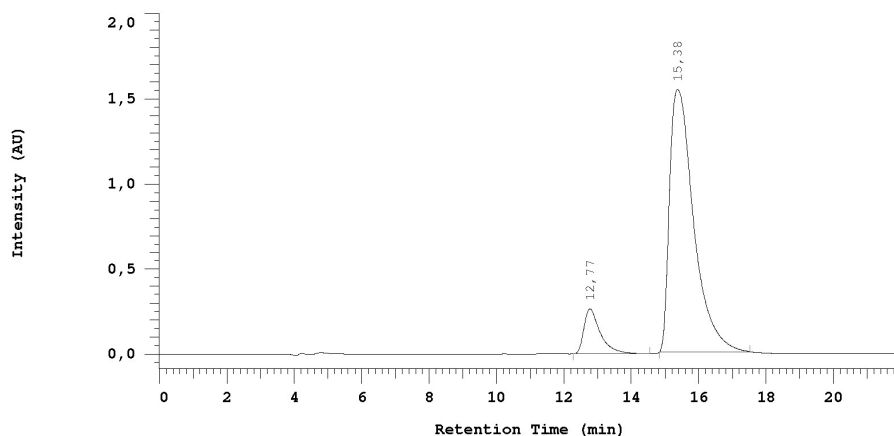

Acquisition Method: fase diretta chirale  
 Column Type:  
 Method Description: esano:IsPrOH 9:1 220 nm F=0,8  
 Peak Quantitation: AREA  
 Calculation Method: AREA%

| No. | RT    | Area     | Conc 1  | BC |
|-----|-------|----------|---------|----|
| 1   | 12,77 | 4494692  | 10,450  | MC |
| 2   | 15,38 | 38516064 | 89,550  | MC |
|     |       | 43010756 | 100,000 |    |
